# Supplementary material for: LncRNA AK023391 promotes tumorigenesis and invasion of gastric cancer through activation of the PI3K/Akt signaling pathway
Source: J Exp Clin Cancer Res. 2017 Dec 28;36:194. doi: 10.1186/s13046-017-0666-2 (PMC5745957; doi:10.1186/s13046-017-0666-2)
Supplement: Supplementary file 3 — Correlation of lncRNA AK023391 expression with clinicopathologic features of GC patients. (DOCX 25 kb) [file 13046_2017_666_MOESM3_ESM.docx]

Additional file 3: Table S3 Correlation of lncRNA AK023391 expression with clinicopathologic features of GC patients

| clinicopathologic features | Cases  (n) | AK023391 expression | | *P* |
| --- | --- | --- | --- | --- |
|  | 77 | Low  65 | High  12 |  |
| ***Age*** |  |  |  |  |
| ≥60 | 48 | 42 | 6 |  |
| <60 | 29 | 23 | 5 | 0.340 |
| ***Gender*** |  |  |  |  |
| Female | 43 | 38 | 5 |  |
| Male | 34 | 27 | 7 | 0.285 |
| ***Tumor size (cm)*** |  |  |  |  |
| <3.5 | 14 | 13 | 1 |  |
| ≥3.5 | 63 | 52 | 11 | 0.339 |
| ***Pathological stage*** |  |  |  |  |
| I+II | 30 | 25 | 5 |  |
| III+VI | 47 | 40 | 7 | 0.835 |
| ***Lymphatic invasion*** |  |  |  |  |
| Positive | 21 | 19 | 2 |  |
| Negative | 56 | 46 | 10 | 0.372 |
| ***T stage*** |  |  |  |  |
| 1+2 | 12 | 10 | 2 |  |
| 3+4 | 65 | 55 | 10 | 0.911 |
| ***N stage*** |  |  |  |  |
| N0+N1 | 32 | 28 | 4 |  |
| N2+N3 | 45 | 37 | 8 | 0.532 |
| ***M stage*** |  |  |  |  |
| Negative | 75 | 63 | 12 |  |
| Positive | 2 | 2 | 0 | 0.541 |
